# Supplementary material
Source: PubMed Central journal article supplement (PMC4146702)
Supplement: NIHMS589977-supplement-supp_TableS1-S3.pdf [file NIHMS589977-supplement-supp_TableS1-S3.pdf]

SUPPLEMENTAL SECTION

Supplemental Table 1a. *Solutions for fixed effects for Insomnia-Model 1*

| Effect                  | Estimate | SE   | DF     | t Value | Pr >  t |
|-------------------------|----------|------|--------|---------|---------|
| Intercept               | 0.32     | 0.05 | 1579.0 | 6.64    | <0.0001 |
| Sex                     |          |      |        |         |         |
| Male                    | -0.12    | 0.04 | 686.1  | -2.77   | 0.006   |
| Female                  | 0.00     | .    | .      | .       | .       |
| Age, centered           | -0.01    | 0.01 | 725.7  | -0.43   | 0.668   |
| Visit year              |          |      |        |         |         |
| 1                       | -0.03    | 0.06 | 1562.0 | -0.59   | 0.554   |
| 3                       | 0.06     | 0.06 | 1599.0 | 0.96    | 0.338   |
| 5                       | 0.02     | 0.06 | 1603.0 | 0.31    | 0.759   |
| Baseline (ref)          | 0.00     | .    | .      | .       | .       |
| Diagnostic group        |          |      |        |         |         |
| AUD+                    | 0.31     | 0.09 | 2071.0 | 3.64    | 0.000   |
| AUD-                    | 0.00     | .    | .      | .       | .       |
| Alcohol symptoms        | 0.03     | 0.01 | 2096.0 | 2.21    | 0.027   |
| Dx group X Visit year   |          |      |        |         |         |
| AUD+ x 1                | 0.05     | 0.10 | 1825.0 | 0.52    | 0.605   |
| AUD+ x 3                | -0.07    | 0.11 | 1838.0 | -0.63   | 0.527   |
| AUD+ x 5                | 0.05     | 0.11 | 1825.0 | 0.49    | 0.625   |
| AUD+ x baseline         | 0.00     | .    | .      | .       | .       |
| AUD- x 1                | 0.00     | .    | .      | .       | .       |
| AUD- x 3                | 0.00     | .    | .      | .       | .       |
| AUD- x 5                | 0.00     | .    | .      | .       | .       |
| AUD- x baseline         | 0.00     | .    | .      | .       | .       |
| Alcohol sx X Visit year |          |      |        |         |         |
| 1                       | -0.02    | 0.03 | 2003.0 | -0.65   | 0.516   |
| 3                       | -0.01    | 0.03 | 2027.0 | -0.34   | 0.734   |
| 5                       | 0.01     | 0.03 | 2001.0 | 0.46    | 0.647   |
| Baseline (ref)          | 0.00     | .    | .      | .       | .       |

Supplemental Table 1b. *Type III tests of fixed effects for Insomnia-Model 1*

| Effect                  | Num DF | Den DF | F Value | Pr > F  |
|-------------------------|--------|--------|---------|---------|
| Sex                     | 1      | 686.1  | 7.65    | 0.01    |
| Age, centered           | 1      | 725.7  | 0.18    | 0.67    |
| Visit Year              | 3      | 1750   | 0.34    | 0.79    |
| Dx group                | 1      | 839    | 42.04   | <0.0001 |
| Alcohol symptoms        | 1      | 2103   | 7.19    | 0.01    |
| Dx group X Visit year   | 3      | 1728   | 0.67    | 0.57    |
| Alcohol sx X Visit year | 3      | 1951   | 0.34    | 0.79    |

Supplemental Table 1c. *Solutions for fixed effects for Insomnia-Model 2*

| Effect                     | Estimate | SE   | DF     | t Value | Pr >  t |
|----------------------------|----------|------|--------|---------|---------|
| Intercept                  | 0.05     | 0.04 | 1388.0 | 1.10    | 0.271   |
| Sex                        |          |      |        |         |         |
| Male                       | -0.01    | 0.04 | 682.8  | -0.19   | 0.850   |
| Female                     | 0.00     | .    | .      | .       | .       |
| Age, centered              | -0.01    | 0.01 | 701.2  | -0.55   | 0.586   |
| Visit year                 |          |      |        |         |         |
| 1                          | 0.05     | 0.04 | 1629.0 | 1.29    | 0.197   |
| 3                          | 0.12     | 0.04 | 1661.0 | 2.75    | 0.006   |
| 5                          | 0.14     | 0.04 | 1657.0 | 3.24    | 0.001   |
| Baseline (ref)             | 0.00     | .    | .      | .       | .       |
| Diagnostic group           |          |      |        |         |         |
| AUD+                       | 0.18     | 0.05 | 852.7  | 3.87    | 0.000   |
| AUD-                       | 0.00     | .    | .      | .       | .       |
| Alcohol symptoms           | 0.00     | 0.01 | 2089.0 | -0.21   | 0.832   |
| Depression (BDI, no sleep) | 0.04     | 0.00 | 2061.0 | 15.61   | <0.0001 |

Supplemental Table 1d. *Type III tests of fixed effects for Insomnia-Model 2*

| Effect                     | Num<br>DF | Den DF | F Value | Pr > F  |
|----------------------------|-----------|--------|---------|---------|
| Sex                        | 1         | 682.8  | 0.04    | 0.85    |
| Age, centered              | 1         | 701.2  | 0.30    | 0.59    |
| Visit Year                 | 3         | 1633.0 | 4.40    | 0.00    |
| Dx group                   | 1         | 852.7  | 15.00   | 0.00    |
| Alcohol symptoms           | 1         | 2089.0 | 0.05    | 0.83    |
| Depression (BDI, no sleep) | 1         | 2061.0 | 243.62  | <0.0001 |

Supplemental Table 2a. *Solutions for fixed effects for Hypersomnia-Model 1*

| Effect                  | Estimate | SE   | DF     | t Value | Pr >  t |
|-------------------------|----------|------|--------|---------|---------|
| Intercept               | -3.09    | 0.30 | 2135.0 | -10.36  | <0.0001 |
| Sex                     |          |      |        |         |         |
| Male                    | -0.79    | 0.17 | 818.6  | -4.64   | <0.0001 |
| Female                  | 0.00     | .    | .      | .       | .       |
| Age, centered           | -0.03    | 0.06 | 823.7  | -0.45   | 0.655   |
| Visit year              |          |      |        |         |         |
| 1                       | 0.93     | 0.36 | 2135.0 | 2.60    | 0.009   |
| 3                       | 0.16     | 0.42 | 2135.0 | 0.38    | 0.703   |
| 5                       | 1.08     | 0.36 | 2135.0 | 3.01    | 0.003   |
| Baseline (ref)          | 0.00     | .    | .      | .       | .       |
| Diagnostic group        |          |      |        |         |         |
| AUD+                    | 1.89     | 0.40 | 2135.0 | 4.75    | <0.0001 |
| AUD-                    | 0.00     | .    | .      | .       | .       |
| Alcohol symptoms        | 0.10     | 0.05 | 2135.0 | 2.02    | 0.044   |
| Dx group X Visit year   |          |      |        |         |         |
| AUD+ x 1                | -1.17    | 0.49 | 2135.0 | -2.38   | 0.017   |
| AUD+ x 3                | -0.55    | 0.54 | 2135.0 | -1.02   | 0.307   |
| AUD+ x 5                | -1.76    | 0.50 | 2135.0 | -3.56   | 0.000   |
| AUD+ x baseline         | 0.00     | .    | .      | .       | .       |
| AUD- x 1                | 0.00     | .    | .      | .       | .       |
| AUD- x 3                | 0.00     | .    | .      | .       | .       |
| AUD- x 5                | 0.00     | .    | .      | .       | .       |
| AUD- x baseline         | 0.00     | .    | .      | .       | .       |
| Alcohol sx X Visit year |          |      |        |         |         |
| 1                       | 0.06     | 0.09 | 2135.0 | 0.66    | 0.510   |
| 3                       | 0.12     | 0.09 | 2135.0 | 1.34    | 0.182   |
| 5                       | 0.07     | 0.10 | 2135.0 | 0.78    | 0.437   |
| Baseline (ref)          | 0.00     | .    | .      | .       | .       |

Supplemental Table 2b. *Type III tests of fixed effects for Hypersomnia-Model 1*

| Effect                  | Num DF | Den DF | F Value | Pr > F  |
|-------------------------|--------|--------|---------|---------|
| Sex                     | 1      | 818.6  | 21.5    | <0.0001 |
| Age, centered           | 1      | 823.7  | 0.2     | 0.66    |
| Visit Year              | 3      | 2135   | 1.29    | 0.28    |
| Dx group                | 1      | 1160   | 26.6    | <0.0001 |
| Alcohol symptoms        | 1      | 2135   | 19.31   | <0.0001 |
| Dx group X Visit year   | 3      | 2135   | 4.84    | 0.00    |
| Alcohol sx X Visit year | 3      | 2135   | 0.66    | 0.58    |

Supplemental Table 2c. *Solutions for fixed effects for Hypersomnia (Model 2)*

| Effect                     | Estimate | SE   | DF     | t Value | Pr >  t |
|----------------------------|----------|------|--------|---------|---------|
| Intercept                  | -3.49    | 0.31 | 2121.0 | -11.30  | <0.0001 |
| Sex                        |          |      |        |         |         |
| Male                       | -0.60    | 0.17 | 791.1  | -3.51   | 0.001   |
| Female                     | 0.00     | .    | .      | .       | .       |
| Age, centered              | -0.01    | 0.06 | 790.9  | -0.26   | 0.798   |
| Visit year                 |          |      |        |         |         |
| 1                          | 1.06     | 0.36 | 2121.0 | 2.95    | 0.003   |
| 3                          | 0.25     | 0.43 | 2121.0 | 0.59    | 0.558   |
| 5                          | 1.18     | 0.36 | 2121.0 | 3.29    | 0.001   |
| Baseline (ref)             | 0.00     | .    | .      | .       | .       |
| Diagnostic group           |          |      |        |         |         |
| AUD+                       | 1.43     | 0.37 | 2121.0 | 3.87    | 0.000   |
| AUD-                       | 0.00     | .    | .      | .       | .       |
| Alcohol symptoms           | 0.10     | 0.04 | 2121.0 | 2.90    | 0.004   |
| Dx group X Visit year      |          |      |        |         |         |
| AUD+ x 1                   | -0.92    | 0.44 | 2121.0 | -2.12   | 0.035   |
| AUD+ x 3                   | -0.10    | 0.50 | 2121.0 | -0.19   | 0.847   |
| AUD+ x 5                   | -1.48    | 0.46 | 2121.0 | -3.21   | 0.001   |
| AUD+ x baseline            | 0.00     | .    | .      | .       | .       |
| AUD- x 1                   | 0.00     | .    | .      | .       | .       |
| AUD- x 3                   | 0.00     | .    | .      | .       | .       |
| AUD- x 5                   | 0.00     | .    | .      | .       | .       |
| AUD- x baseline            | 0.00     | .    | .      | .       | .       |
| Depression (BDI, no sleep) | 0.05     | 0.01 | 2121.0 | 5.84    | <0.0001 |

Supplemental Table 2d. *Type III tests of fixed effects for Hypersomnia-Model 2*

| Effect                     | Num DF | Den DF | F Value | Pr > F  |
|----------------------------|--------|--------|---------|---------|
| Sex                        | 1      | 791.1  | 12.32   | 0.00    |
| Age, centered              | 1      | 790.9  | 0.07    | 0.80    |
| Visit Year                 | 3      | 2121   | 2.82    | 0.04    |
| Dx group                   | 1      | 1177   | 15.94   | <0.0001 |
| Alcohol symptoms           | 1      | 2121   | 8.4     | 0.00    |
| Dx group x Visit year      | 3      | 2121   | 4.63    | 0.00    |
| Depression (BDI, no sleep) | 1      | 2121   | 34.16   | <0.0001 |

Supplemental Table 3a. *Solutions for fixed effects for Sleep Variability-Model 1*

| Effect                  | Estimate | SE   | DF     | t Value | Pr >  t |
|-------------------------|----------|------|--------|---------|---------|
| Intercept               | 1.16     | 0.11 | 1619.0 | 10.79   | <0.0001 |
| Sex                     |          |      |        |         |         |
| Male                    | -0.03    | 0.09 | 631.3  | -0.33   | 0.738   |
| Female                  | 0.00     | .    | .      | .       | .       |
| Age, centered           | -0.03    | 0.03 | 680.6  | -1.04   | 0.297   |
| Visit year              |          |      |        |         |         |
| 1                       | 0.79     | 0.14 | 1381.0 | 5.46    | <0.0001 |
| 3                       | 0.48     | 0.14 | 1376.0 | 3.49    | 0.001   |
| 5                       | 0.33     | 0.14 | 1407.0 | 2.36    | 0.018   |
| Baseline (ref)          | 0.00     | .    | .      | .       | .       |
| Diagnostic group        |          |      |        |         |         |
| AUD+                    | 0.90     | 0.20 | 1752.0 | 4.58    | <0.0001 |
| AUD-                    | 0.00     | .    | .      | .       | .       |
| Alcohol symptoms        | 0.03     | 0.03 | 1745.0 | 0.81    | 0.420   |
| Dx group X Visit year   |          |      |        |         |         |
| AUD+ x 1                | -0.75    | 0.25 | 1523.0 | -2.99   | 0.003   |
| AUD+ x 3                | -1.29    | 0.25 | 1551.0 | -5.17   | <0.0001 |
| AUD+ x 5                | -1.10    | 0.25 | 1571.0 | -4.44   | <0.0001 |
| AUD+ x baseline         | 0.00     | .    | .      | .       | .       |
| AUD- x 1                | 0.00     | .    | .      | .       | .       |
| AUD- x 3                | 0.00     | .    | .      | .       | .       |
| AUD- x 5                | 0.00     | .    | .      | .       | .       |
| AUD- x baseline         | 0.00     | .    | .      | .       | .       |
| Alcohol sx X Visit year |          |      |        |         |         |
| 1                       | -0.01    | 0.06 | 1701.0 | -0.22   | 0.825   |
| 3                       | 0.01     | 0.06 | 1728.0 | 0.25    | 0.800   |
| 5                       | -0.01    | 0.06 | 1725.0 | -0.13   | 0.893   |
| Baseline (ref)          | 0.00     | .    | .      | .       | .       |

Supplemental Table 3b. *Type III tests of fixed effects for Sleep Variability -Model 1*

| Effect                  | Num DF | Den DF | F Value | Pr > F  |
|-------------------------|--------|--------|---------|---------|
| Sex                     | 1      | 631.3  | 0.11    | 0.74    |
| Age, centered           | 1      | 680.6  | 1.09    | 0.30    |
| Visit Year              | 3      | 1491   | 10.75   | <0.0001 |
| Dx group                | 1      | 767.9  | 1.45    | 0.23    |
| Alcohol symptoms        | 1      | 1758   | 1.15    | 0.28    |
| Dx group X Visit year   | 3      | 1467   | 10.02   | <0.0001 |
| Alcohol sx X Visit year | 3      | 1687   | 0.06    | 0.98    |

Supplemental Table 3c. *Solutions for fixed effects for Sleep Variability (Model 2)*

| Effect                     | Estimate | SE   | DF     | t Value | Pr >  t |
|----------------------------|----------|------|--------|---------|---------|
| Intercept                  | 1.13     | 0.11 | 1621.0 | 9.88    | <0.0001 |
| Sex                        |          |      |        |         |         |
| Male                       | -0.01    | 0.09 | 646.0  | -0.12   | 0.907   |
| Female                     | 0.00     | .    | .      | .       | .       |
| Age, centered              | -0.03    | 0.03 | 670.8  | -1.11   | 0.266   |
| Visit year                 |          |      |        |         |         |
| 1                          | 0.79     | 0.14 | 1359.0 | 5.50    | <0.0001 |
| 3                          | 0.51     | 0.14 | 1359.0 | 3.69    | 0.000   |
| 5                          | 0.36     | 0.14 | 1381.0 | 2.57    | 0.010   |
| Baseline (ref)             | 0.00     | .    | .      | .       | .       |
| Diagnostic group           |          |      |        |         |         |
| AUD+                       | 0.88     | 0.17 | 1710.0 | 5.22    | <0.0001 |
| AUD-                       | 0.00     | .    | .      | .       | .       |
| Alcohol symptoms           | 0.02     | 0.02 | 1745.0 | 1.05    | 0.296   |
| Dx group X Visit year      |          |      |        |         |         |
| AUD+ x 1                   | -0.73    | 0.21 | 1387.0 | -3.54   | 0.000   |
| AUD+ x 3                   | -1.26    | 0.21 | 1408.0 | -6.12   | <0.0001 |
| AUD+ x 5                   | -1.11    | 0.22 | 1465.0 | -5.17   | <0.0001 |
| AUD+ x baseline            | 0.00     | .    | .      | .       | .       |
| AUD- x 1                   | 0.00     | .    | .      | .       | .       |
| AUD- x 3                   | 0.00     | .    | .      | .       | .       |
| AUD- x 5                   | 0.00     | .    | .      | .       | .       |
| AUD- x baseline            | 0.00     | .    | .      | .       | .       |
| Depression (BDI, no sleep) | 0.00     | 0.01 | 1679.0 | 0.59    | 0.554   |

Supplemental Table 3d. *Type III tests of fixed effects for Sleep Variability-Model 2*

| Effect                     | Num DF | Den DF | F Value | Pr > F  |
|----------------------------|--------|--------|---------|---------|
| Sex                        | 1      | 646    | 0.01    | 0.91    |
| Age, centered              | 1      | 670.8  | 1.24    | 0.27    |
| Visit Year                 | 3      | 1385   | 13.46   | <0.0001 |
| Dx group                   | 1      | 780.7  | 1.07    | 0.30    |
| Alcohol symptoms           | 1      | 1745   | 1.09    | 0.30    |
| Dx group x Visit year      | 3      | 1391   | 14.57   | <0.0001 |
| Depression (BDI, no sleep) | 1      | 1679   | 0.35    | 0.55    |
